# Supplementary material
Source: HighWire-hosted journal article supplement (https://jnis.bmj.com/content/15/6/594)
Supplement: inline-supplementary-material-1 [file inline-supplementary-material-1.pdf]

**Supplementary Appendix****Supplementary Table 1**

Quantitative analysis - contrast to noise ratios of the different LEAs, contrast medium and saline along each sector of the in vitro models provided as mean  $\pm$  standard deviation.

|                           | <b>2.0 mm</b>   | <b>1.5 mm</b>   | <b>1.0 mm</b>   |
|---------------------------|-----------------|-----------------|-----------------|
| <b>Onyx 18</b>            | 3.02 $\pm$ 0.42 | 2.65 $\pm$ 0.32 | 1.76 $\pm$ 0.51 |
| <b>Squid 18</b>           | 2.43 $\pm$ 0.33 | 2.28 $\pm$ 0.32 | 1.62 $\pm$ 0.31 |
| <b>Squid 12</b>           | 3.09 $\pm$ 0.20 | 2.32 $\pm$ 0.26 | 1.92 $\pm$ 0.32 |
| <b>PHIL 25%</b>           | 1.92 $\pm$ 0.35 | 1.35 $\pm$ 0.28 | 0.81 $\pm$ 0.13 |
| <b>PHIL LV</b>            | 1.89 $\pm$ 0.23 | 1.37 $\pm$ 0.33 | 0.68 $\pm$ 0.12 |
| <b>NBCA / iodized oil</b> | 3.18 $\pm$ 0.15 | 2.53 $\pm$ 0.15 | 1.57 $\pm$ 0.23 |
| <b>Contrast medium</b>    | 3.40 $\pm$ 0.25 | 3.08 $\pm$ 0.16 | 1.86 $\pm$ 0.10 |
| <b>Saline</b>             | 0.04 $\pm$ 0.03 | 0.04 $\pm$ 0.04 | 0.08 $\pm$ 0.04 |

**Supplementary Table 2**

Table 2: Qualitative analysis - scores of the different LEAs, contrast medium and saline along each sector of the in vitro models provided as mean  $\pm$  standard deviation.

|                           | <b>2.0 mm</b>   | <b>1.5 mm</b>   | <b>1.0 mm</b>   |
|---------------------------|-----------------|-----------------|-----------------|
| <b>Onyx 18</b>            | 5.00 $\pm$ 0.00 | 5.00 $\pm$ 0.00 | 4.67 $\pm$ 0.49 |
| <b>Squid 18</b>           | 4.92 $\pm$ 0.29 | 4.92 $\pm$ 0.29 | 4.33 $\pm$ 0.49 |
| <b>Squid 12</b>           | 5.00 $\pm$ 0.00 | 4.25 $\pm$ 0.45 | 4.00 $\pm$ 0.00 |
| <b>PHIL 25%</b>           | 3.75 $\pm$ 0.45 | 3.08 $\pm$ 0.29 | 2.58 $\pm$ 0.67 |
| <b>PHIL LV</b>            | 4.08 $\pm$ 0.29 | 2.92 $\pm$ 0.29 | 2.08 $\pm$ 0.29 |
| <b>NBCA / iodized oil</b> | 5.00 $\pm$ 0.00 | 4.92 $\pm$ 0.29 | 4.58 $\pm$ 0.51 |
| <b>Contrast medium</b>    | 5.00 $\pm$ 0.00 | 5.00 $\pm$ 0.00 | 5.00 $\pm$ 0.00 |
| <b>Saline</b>             | 1.00 $\pm$ 0.00 | 1.00 $\pm$ 0.00 | 1.00 $\pm$ 0.00 |
